# Supplementary material for: Epigenetic Suppression of the T-box Subfamily 2 (TBX2) in Human Non-Small Cell Lung Cancer
Source: PubMed Central journal article supplement (PMC6429281; doi:10.3390/ijms20051159), 2019-03-07
Supplement: ijms-20-01159-s001.pdf [file ijms-20-01159-s001.pdf]

# Epigenetic suppression of the T-box subfamily 2 (*TBX2*) in human non-small cell lung cancer

Eliana Nehme, Zahraa Rahal, Ansam Sinjab, Athar Khalil, Hassan Chami, Georges Nemer, Humam Kadara

## SUPPLEMENTARY TABLES

**Table S1: Members of the *TBX2* subfamily are hyper-methylated in NSCLC cell lines.**

| Genes         | <i>TBX4</i> |       | <i>TBX5</i> |       |
|---------------|-------------|-------|-------------|-------|
|               | UM (%)      | M (%) | UM (%)      | M (%) |
| <b>H1299</b>  | 0           | 100   | 0.37        | 99.63 |
| <b>H1693</b>  | 0           | 100   | 48.09       | 51.91 |
| <b>H1792</b>  | 0.31        | 99.69 | 31.64       | 68.36 |
| <b>H23</b>    | 0.04        | 99.96 | 0           | 100   |
| <b>H3255</b>  | 0.21        | 99.79 | 99.95       | 0.05  |
| <b>H460</b>   | 0.04        | 99.96 | 0.75        | 99.25 |
| <b>H1650</b>  | 0.33        | 99.67 | 0.14        | 99.86 |
| <b>HCC827</b> | 0           | 100   | 26.42       | 73.58 |
| <b>NAC</b>    | 98.73       | 1.27  | 98.8        | 1.2   |

UM, unmethylated fraction; M, methylated fraction; NAC, normal alveolar cells

**Table S2: Primer sequences for *TBX2*, *TBX3*, *TBX4*, *TBX5* and *GAPDH* PCR analysis.**

| Gene         | Sequence (5'-3')           | Reference              |
|--------------|----------------------------|------------------------|
| <i>TBX2</i>  | F-AGTGGATGGCTAAGCCTG       | (Z. Zhang & Guo, 2014) |
|              | R- ACGGGTTGTTGTCGATC       |                        |
| <i>TBX3</i>  | F-GAGGCTAAAGA ACTTTGGGATCA | Primer bank            |
|              | R- CATTTCGGGGTTCGGCCTTA    |                        |
| <i>TBX4</i>  | F- CACTACCAGCACGAGAAC      | (Horie et al., 2017)   |
|              | R- CCAGATAGGATCGCTTGC      |                        |
| <i>TBX5</i>  | F- AAGTAAAGAATATCCCGTGGTC  | (R. Ma et al., 2017)   |
|              | R- AGACTCGCTGCTGAAAGG      |                        |
| <i>GAPDH</i> | F- GTCAGTGGTGGACCTGACCT    | (Pasini et al., 2007)  |
|              | R- TCGCTGTTGAAGTCAGAGGA    |                        |

## References

1. Zhang, Z., & Guo, Y. (2014). High *TBX2* expression predicts poor prognosis in non-small cell lung cancer. *Neoplasma*. doi:10.4149/neo\_2014\_059
2. Horie, M., Miyashita, N., Mikami, Y., Noguchi, S., Yamauchi, Y., Suzukawa, M., . . . Nagase, T. (2017). *TBX4* is involved in the super-enhancer-driven transcriptional programs underlying features specific to lung fibroblasts. *American Journal of Physiology-Lung Cellular and Molecular Physiology*, 314(1), L177-L191. doi:10.1152/ajplung.00193.2017
3. Ma, R., Yang, Y., Tu, Q., & Hu, K. (2017). Overexpression of T-box Transcription Factor 5 (*TBX5*) Inhibits Proliferation and Invasion in Non-Small Cell Lung Carcinoma Cells. *Oncology research*, 25(9), 1495-1504. doi:10.3727/096504017x14883287513729
4. Pasini, B., McWhinney, S. R., Bei, T., Matyakhina, L., Stergiopoulos, S., Muchow, M., . . . Stratakis, C. A. (2007). Clinical and molecular genetics of patients with the Carney–Stratakis syndrome and germline mutations of the genes coding for the succinate dehydrogenase subunits *SDHB*, *SDHC*, and *SDHD*. *European Journal Of Human Genetics*, 16, 79. doi:10.1038/sj.ejhg.5201904.
